# Supplementary material
Source: PubMed Central journal article supplement (PMC3099739)
Supplement: NIHMS259175-supplement-1_si_001.pdf [file NIHMS259175-supplement-1_si_001.pdf]

Supporting Information for manuscript:

**Measuring Surface Binding Thermodynamics and Kinetics by using Total Internal Reflection with Fluorescence Correlation Spectroscopy: Practical Considerations**

Nancy L. Thompson,<sup>1,2</sup> Punya Navaratnarajah<sup>3</sup> and Xiang Wang<sup>1</sup>

Departments of <sup>1</sup>Chemistry and <sup>3</sup>Biochemistry & Biophysics  
University of North Carolina at Chapel Hill  
Chapel Hill, NC, USA 27599

## SUPPLEMENTARY MATERIAL

This material contains four Tables. Equilibrium constants  $K$  are in units of  $M^{-1}$ , concentrations  $A$  are in units of nM, and surface site densities are in units of molecules/ $\mu m^2$ .  $G_s(0)$  values,  $G_a(0)$  values,  $X = KA$  values, and rebinding probabilities  $P$  are unit-less. In all cases, it has been assumed that  $d = 0.1 \mu m$ ,  $h = 0.5 \mu m$ ,  $D = 50 \mu m^2 s^{-1}$  and  $k_a = 10^6 M^{-1} s^{-1}$ . Data are given for the four cases in which the minimum tolerable value of  $G_s(0)$ , denoted by  $[G_s(0)]_{\min}$ , is 0.05, 0.01, 0.005 or 0.001.

$S_{\max}$  values denote the surface site densities for which  $G_s(0)$  is maximized; depend on  $d$ ,  $X$  and  $K$ ; and were calculated from Eq. 13. The  $S_{\max}$  values give an expression for the maximum value of  $G_s(0)$  which also depends on  $d$ ,  $X$  and  $K$  (Eq. 14). By setting this expression equal to  $[G_s(0)]_{\min}$ , one finds a maximum value of  $X$ , denoted by  $X_{\max}$ , which equals

$$X_{\max} = \frac{1}{2} \left[ -1 + \sqrt{1 + \frac{K}{\pi h^2 d [G_s(0)]_{\min}}} \right]$$

In the tables, for a given value of  $K$  and  $[G_s(0)]_{\min}$ , the minimum value of  $X$  considered was 0.0001 and the maximum value of  $X$  was calculated from the above equation. Surface site densities  $S_1$  and  $S_2$  denote the minimum and maximum values for which  $G_s(0) \geq [G_s(0)]_{\min}$ , depend on  $K$ ,  $X$ ,  $d$  and  $h$ , and were calculated from the following generalization of Eq. 16:

$$S_{1,2} = \frac{K - 2\pi h^2 d X (1 + X) [G_s(0)]_{\min} \mp \sqrt{K^2 - 4\pi h^2 d K X (1 + X) [G_s(0)]_{\min}}}{2\pi h^2 K X [G_s(0)]_{\min}}$$

Surface site densities  $S_3$  denote values below which  $G_s(0)/G_a(0)$  exceeds 0.1, depend on  $d$ ,  $X$  and  $K$ , and were calculated from Eq. 18. Surface site densities  $S_4$  denote values above which  $P \geq 0.05$ , depend on  $S$  and  $X$ , and were found by numerically integrating Eq. 19 with Eq. 20. The range of allowable surface site densities was calculated as the maximum of  $S_1$  and  $S_3$  to the minimum of  $S_2$  and  $S_4$ . This range reflects the constraints that  $G_s(0) \geq [G_s(0)]_{\min}$ ,  $[G_s(0)/G_a(0)] \geq 0.1$ , and  $P \leq 0.05$ , and is not meant as an absolute requirement for successful TIR-FCS measurements. Using surface site densities outside of this range will have the consequence of violating one of these three constraints and the violation of these constraints may require analysis with a more sophisticated model than that shown in Eqs. 6 and 9-11.

All four tables show calculated quantities for the four considered values of  $[G_s(0)]_{\min}$ , six considered values of  $K$ , and  $X = 0.0001$  or  $X = X_{\max}$ . Table S1 shows  $S_1$ ,  $S_2$ ,  $S_3$ ,  $S_4$ ,  $S_{\max}$  and the  $S$  range. Tables S2, S3 and S4 show predicted values of  $G_s(0)$ ,  $G_s(0)/G_a(0)$ , and  $P$ , respectively, for the five surface site densities and the  $S$  range.

**Table S1: Surface site densities for lower values of  $G_s(0)$** 

| $[G_s(0)]_{\min}$ | K               | X       | A      | $S_1$                | $S_2$             | $S_3$ | $S_4$ | $S_{\max}$ | S range   |
|-------------------|-----------------|---------|--------|----------------------|-------------------|-------|-------|------------|-----------|
| 0.05              | $10^7$          | 0.0001  | 0.01   | $1.4 \times 10^{-4}$ | $2.5 \times 10^5$ | 0.30  | 3300  | 6.0        | 0.30-3300 |
|                   |                 | 0.643   | 64.3   | 9.9                  | 9.9               | 0.81  | 5400  | 9.9        | 9.9       |
|                   | $3 \times 10^6$ | 0.0001  | 0.0333 | 0.0016               | $2.5 \times 10^5$ | 1.0   | 3300  | 20         | 1.0-3300  |
|                   |                 | 0.253   | 84.3   | 25                   | 25                | 1.6   | 4100  | 25         | 25        |
|                   | $10^6$          | 0.0001  | 0.1    | 0.014                | $2.5 \times 10^5$ | 3.0   | 3300  | 60         | 3.0-3300  |
|                   |                 | 0.0964  | 96.4   | 66                   | 66                | 3.6   | 3600  | 66         | 66        |
| $3 \times 10^5$   | 0.0001          | 0.333   | 0.16   | $2.5 \times 10^5$    | 10                | 3300  | 200   | 10-3300    |           |
|                   |                 | 0.0308  | 103    | 210                  | 210               | 11    | 3400  | 210        | 210       |
|                   | $10^5$          | 0.0001  | 1      | 1.4                  | $2.5 \times 10^5$ | 30    | 3300  | 600        | 30-3300   |
|                   |                 | 0.0105  | 105    | 610                  | 610               | 31    | 3300  | 610        | 610       |
|                   | $3 \times 10^4$ | 0.0001  | 3.33   | 16                   | $2.5 \times 10^5$ | 100   | 3300  | 2000       | 100-3300  |
|                   |                 | 0.00316 | 105    | 2000                 | 2000              | 100   | 3300  | 2000       | 2000      |
| 0.01              | $10^7$          | 0.0001  | 0.01   | $2.9 \times 10^{-5}$ | $1.3 \times 10^6$ | 0.30  | 3300  | 6.0        | 0.30-3300 |
|                   |                 | 1.85    | 185    | 17                   | 17                | 2.4   | 9400  | 17         | 17        |
|                   | $3 \times 10^6$ | 0.0001  | 0.0333 | $3.2 \times 10^{-4}$ | $1.3 \times 10^6$ | 1.0   | 3300  | 20         | 1.0-3300  |
|                   |                 | 0.855   | 285    | 37                   | 37                | 3.5   | 6100  | 37         | 37        |
|                   | $10^6$          | 0.0001  | 0.1    | 0.0029               | $1.3 \times 10^6$ | 3.0   | 3300  | 60         | 3.0-3300  |
|                   |                 | 0.382   | 382    | 83                   | 83                | 5.8   | 4500  | 83         | 83        |
| $3 \times 10^5$   | 0.0001          | 0.333   | 0.032  | $1.3 \times 10^6$    | 10                | 3300  | 200   | 10-3300    |           |
|                   |                 | 0.139   | 463    | 230                  | 230               | 13    | 3700  | 230        | 230       |
|                   | $10^5$          | 0.0001  | 1      | 0.29                 | $1.3 \times 10^6$ | 30    | 3300  | 600        | 30-3300   |
|                   |                 | 0.0503  | 503    | 630                  | 630               | 33    | 3400  | 630        | 630       |
|                   | $3 \times 10^4$ | 0.0001  | 3.33   | 3.2                  | $1.3 \times 10^6$ | 100   | 3300  | 2000       | 100-3300  |
|                   |                 | 0.0156  | 520    | 2000                 | 2000              | 100   | 3300  | 2000       | 2000      |
| 0.005             | $10^7$          | 0.0001  | 0.01   | $1.4 \times 10^{-5}$ | $2.5 \times 10^6$ | 0.30  | 3300  | 6.0        | 0.30-3300 |
|                   |                 | 2.79    | 279    | 23                   | 23                | 4.3   | 12500 | 23         | 23        |
|                   | $3 \times 10^6$ | 0.0001  | 0.0333 | $1.6 \times 10^{-4}$ | $2.5 \times 10^6$ | 1.0   | 3300  | 20         | 1.0-3300  |
|                   |                 | 1.35    | 450    | 47                   | 47                | 5.5   | 7700  | 47         | 47        |
|                   | $10^6$          | 0.0001  | 0.1    | 0.0014               | $2.5 \times 10^6$ | 3.0   | 3300  | 60         | 3.0-3300  |
|                   |                 | 0.643   | 643    | 99                   | 99                | 8.1   | 5400  | 99         | 99        |
| $3 \times 10^5$   | 0.0001          | 0.333   | 0.016  | $2.5 \times 10^6$    | 10                | 3300  | 200   | 10-3300    |           |
|                   |                 | 0.253   | 843    | 250                  | 250               | 16    | 4100  | 250        | 250       |
|                   | $10^5$          | 0.0001  | 1      | 0.14                 | $2.5 \times 10^6$ | 30    | 3300  | 600        | 30-3300   |
|                   |                 | 0.0964  | 964    | 660                  | 660               | 36    | 3600  | 660        | 660       |
|                   | $3 \times 10^4$ | 0.0001  | 3.33   | 1.6                  | $2.5 \times 10^6$ | 100   | 3300  | 2000       | 100-3300  |
|                   |                 | 0.0308  | 1030   | 2100                 | 2100              | 110   | 3400  | 2100       | 2100      |
| 0.001             | $10^7$          | 0.0001  | 0.01   | $2.9 \times 10^{-6}$ | $1.3 \times 10^7$ | 0.30  | 3300  | 6.0        | 0.30-3300 |
|                   |                 | 6.79    | 679    | 47                   | 47                | 18    | 25000 | 47         | 47        |
|                   | $3 \times 10^6$ | 0.0001  | 0.0333 | $3.2 \times 10^{-5}$ | $1.3 \times 10^7$ | 1.0   | 3300  | 20         | 1.0-3300  |
|                   |                 | 3.51    | 1170   | 91                   | 91                | 20    | 15000 | 91         | 91        |
|                   | $10^6$          | 0.0001  | 0.1    | $2.9 \times 10^{-4}$ | $1.3 \times 10^7$ | 3.0   | 3300  | 60         | 3.0-3300  |
|                   |                 | 1.85    | 1850   | 170                  | 170               | 24    | 9400  | 170        | 170       |
| $3 \times 10^5$   | 0.0001          | 0.333   | 0.0032 | $1.3 \times 10^7$    | 10                | 3300  | 200   | 10-3300    |           |
|                   |                 | 0.854   | 2840   | 370                  | 370               | 35    | 6100  | 370        | 370       |
|                   | $10^5$          | 0.0001  | 1      | 0.029                | $1.3 \times 10^7$ | 30    | 3300  | 600        | 30-3300   |
|                   |                 | 0.382   | 3820   | 830                  | 830               | 58    | 4500  | 830        | 830       |
|                   | $3 \times 10^4$ | 0.0001  | 3.33   | 0.32                 | $1.3 \times 10^7$ | 100   | 3300  | 2000       | 100-3300  |
|                   |                 | 0.139   | 4630   | 2300                 | 2300              | 130   | 3700  | 2300       | 2300      |

**Table S2:  $G_s(0)$  values for different surface site densities**

| $[G_s(0)]_{\min}$ | K               | X       | $G_s(0)$ |       |                      |                      |            |          |
|-------------------|-----------------|---------|----------|-------|----------------------|----------------------|------------|----------|
|                   |                 |         | $S_1$    | $S_2$ | $S_3$                | $S_4$                | $S_{\max}$ | S range  |
| 0.05              | $10^7$          | 0.0001  | 0.05     | 0.05  | 95                   | 3.8                  | 530        | 3.8-95   |
|                   |                 | 0.643   | 0.05     | 0.05  | 0.014                | $3.7 \times 10^{-4}$ | 0.05       | 0.05     |
|                   | $3 \times 10^6$ | 0.0001  | 0.05     | 0.05  | 29                   | 3.8                  | 160        | 3.8-29   |
|                   |                 | 0.253   | 0.05     | 0.05  | 0.011                | 0.0012               | 0.05       | 0.05     |
|                   | $10^6$          | 0.0001  | 0.05     | 0.05  | 9.5                  | 3.7                  | 53         | 3.7-9.5  |
|                   |                 | 0.0964  | 0.05     | 0.05  | 0.0099               | 0.0035               | 0.05       | 0.05     |
|                   | $3 \times 10^5$ | 0.0001  | 0.05     | 0.05  | 2.9                  | 3.4                  | 16         | 2.9-3.4  |
|                   |                 | 0.0308  | 0.05     | 0.05  | 0.0093               | 0.011                | 0.05       | 0.05     |
|                   | $10^5$          | 0.0001  | 0.05     | 0.05  | 0.95                 | 2.8                  | 5.3        | 0.95-2.8 |
|                   |                 | 0.0105  | 0.05     | 0.05  | 0.0092               | 0.026                | 0.05       | 0.05     |
|                   | $3 \times 10^4$ | 0.0001  | 0.05     | 0.05  | 0.29                 | 1.5                  | 1.6        | 0.29-1.5 |
|                   |                 | 0.00316 | 0.05     | 0.05  | 0.0091               | 0.047                | 0.05       | 0.05     |
| 0.01              | $10^7$          | 0.0001  | 0.01     | 0.01  | 95                   | 3.8                  | 530        | 3.8-95   |
|                   |                 | 1.85    | 0.01     | 0.01  | 0.0044               | $7.3 \times 10^{-5}$ | 0.01       | 0.01     |
|                   | $3 \times 10^6$ | 0.0001  | 0.01     | 0.01  | 29                   | 3.8                  | 160        | 3.8-29   |
|                   |                 | 0.855   | 0.01     | 0.01  | 0.0031               | $2.4 \times 10^{-4}$ | 0.01       | 0.01     |
|                   | $10^6$          | 0.0001  | 0.01     | 0.01  | 9.5                  | 3.7                  | 53         | 3.7-9.5  |
|                   |                 | 0.382   | 0.01     | 0.01  | 0.0024               | $7.1 \times 10^{-4}$ | 0.01       | 0.01     |
|                   | $3 \times 10^5$ | 0.0001  | 0.01     | 0.01  | 2.9                  | 3.4                  | 16         | 2.9-3.4  |
|                   |                 | 0.139   | 0.01     | 0.01  | 0.0020               | 0.0022               | 0.01       | 0.01     |
|                   | $10^5$          | 0.0001  | 0.01     | 0.01  | 0.95                 | 2.8                  | 5.3        | 0.95-2.8 |
|                   |                 | 0.0503  | 0.01     | 0.01  | 0.0019               | 0.0053               | 0.01       | 0.01     |
|                   | $3 \times 10^4$ | 0.0001  | 0.01     | 0.01  | 0.29                 | 1.5                  | 1.6        | 0.29-1.5 |
|                   |                 | 0.0156  | 0.01     | 0.01  | 0.0018               | 0.0095               | 0.01       | 0.01     |
| 0.005             | $10^7$          | 0.0001  | 0.005    | 0.005 | 95                   | 3.8                  | 530        | 3.8-95   |
|                   |                 | 2.79    | 0.005    | 0.005 | 0.0027               | $3.7 \times 10^{-5}$ | 0.005      | 0.005    |
|                   | $3 \times 10^6$ | 0.0001  | 0.005    | 0.005 | 29                   | 3.8                  | 160        | 3.8-29   |
|                   |                 | 1.35    | 0.005    | 0.005 | 0.0019               | $1.2 \times 10^{-4}$ | 0.005      | 0.005    |
|                   | $10^6$          | 0.0001  | 0.005    | 0.005 | 9.5                  | 3.7                  | 53         | 3.7-9.5  |
|                   |                 | 0.643   | 0.005    | 0.005 | 0.0014               | $3.5 \times 10^{-4}$ | 0.005      | 0.005    |
|                   | $3 \times 10^5$ | 0.0001  | 0.005    | 0.005 | 2.9                  | 3.4                  | 16         | 2.9-3.4  |
|                   |                 | 0.253   | 0.005    | 0.005 | 0.0011               | 0.0011               | 0.005      | 0.005    |
|                   | $10^5$          | 0.0001  | 0.005    | 0.005 | 0.95                 | 2.8                  | 5.3        | 0.95-2.8 |
|                   |                 | 0.0964  | 0.005    | 0.005 | $9.9 \times 10^{-4}$ | 0.0026               | 0.005      | 0.005    |
|                   | $3 \times 10^4$ | 0.0001  | 0.005    | 0.005 | 0.29                 | 1.5                  | 1.6        | 0.29-1.5 |
|                   |                 | 0.0308  | 0.005    | 0.005 | $9.3 \times 10^{-4}$ | 0.0047               | 0.005      | 0.005    |
| 0.001             | $10^7$          | 0.0001  | 0.001    | 0.001 | 95                   | 3.8                  | 530        | 3.8-95   |
|                   |                 | 6.79    | 0.001    | 0.001 | $8.1 \times 10^{-4}$ | $7.5 \times 10^{-6}$ | 0.001      | 0.001    |
|                   | $3 \times 10^6$ | 0.0001  | 0.001    | 0.001 | 29                   | 3.8                  | 160        | 3.8-29   |
|                   |                 | 3.51    | 0.001    | 0.001 | $6.0 \times 10^{-4}$ | $2.4 \times 10^{-5}$ | 0.001      | 0.001    |
|                   | $10^6$          | 0.0001  | 0.001    | 0.001 | 9.5                  | 3.7                  | 53         | 3.7-9.5  |
|                   |                 | 1.85    | 0.001    | 0.001 | $4.4 \times 10^{-4}$ | $7.1 \times 10^{-5}$ | 0.001      | 0.001    |
|                   | $3 \times 10^5$ | 0.0001  | 0.001    | 0.001 | 2.9                  | 3.4                  | 16         | 2.9-3.4  |
|                   |                 | 0.854   | 0.001    | 0.001 | $3.1 \times 10^{-4}$ | $3.2 \times 10^{-4}$ | 0.001      | 0.001    |
|                   | $10^5$          | 0.0001  | 0.001    | 0.001 | 0.95                 | 2.8                  | 5.3        | 0.95-2.8 |
|                   |                 | 0.382   | 0.001    | 0.001 | $2.4 \times 10^{-4}$ | $5.3 \times 10^{-4}$ | 0.001      | 0.001    |
|                   | $3 \times 10^4$ | 0.0001  | 0.001    | 0.001 | 0.29                 | 1.5                  | 1.6        | 0.29-1.5 |
|                   |                 | 0.139   | 0.001    | 0.001 | $2.0 \times 10^{-4}$ | $9.5 \times 10^{-4}$ | 0.001      | 0.001    |

**Table S3:  $G_s(0)/G_a(0)$  values for different surface site densities**

| $[G_s(0)]_{\min}$ | K               | X       | $G_s(0)/G_a(0)$      |                   |       |       |            |          |
|-------------------|-----------------|---------|----------------------|-------------------|-------|-------|------------|----------|
|                   |                 |         | $S_1$                | $S_2$             | $S_3$ | $S_4$ | $S_{\max}$ | S range  |
| 0.05              | $10^7$          | 0.0001  | $4.7 \times 10^{-5}$ | $8.5 \times 10^4$ | 0.1   | 1100  | 2.0        | 0.1-1100 |
|                   |                 | 0.643   | 1.2                  | 1.2               | 0.1   | 660   | 1.2        | 1.2      |
|                   | $3 \times 10^6$ | 0.0001  | $1.6 \times 10^{-4}$ | $2.5 \times 10^4$ | 0.1   | 330   | 2.0        | 0.1-330  |
|                   |                 | 0.253   | 1.6                  | 1.6               | 0.1   | 260   | 1.6        | 1.6      |
|                   | $10^6$          | 0.0001  | $4.7 \times 10^{-4}$ | 8500              | 0.1   | 110   | 2.0        | 0.1-110  |
|                   |                 | 0.0964  | 1.8                  | 1.8               | 0.1   | 99    | 1.8        | 1.8      |
|                   | $3 \times 10^5$ | 0.0001  | 0.0016               | 2500              | 0.1   | 33    | 2.0        | 0.1-33   |
|                   |                 | 0.0308  | 1.9                  | 1.9               | 0.1   | 32    | 1.9        | 1.9      |
|                   | $10^5$          | 0.0001  | 0.0048               | 840               | 0.1   | 11    | 2.0        | 0.1-11   |
|                   |                 | 0.0105  | 2.0                  | 2.0               | 0.1   | 11    | 2.0        | 2.0      |
|                   | $3 \times 10^4$ | 0.0001  | 0.016                | 250               | 0.1   | 3.3   | 2.0        | 0.1-3.3  |
|                   |                 | 0.00316 | 2.0                  | 2.0               | 0.1   | 3.3   | 2.0        | 2.0      |
| 0.01              | $10^7$          | 0.0001  | $9.5 \times 10^{-6}$ | $4.2 \times 10^5$ | 0.1   | 1100  | 2.0        | 0.1-1100 |
|                   |                 | 1.85    | 0.70                 | 0.70              | 0.1   | 380   | 0.70       | 0.70     |
|                   | $3 \times 10^6$ | 0.0001  | $3.2 \times 10^{-5}$ | $1.3 \times 10^5$ | 0.1   | 330   | 2.0        | 0.1-330  |
|                   |                 | 0.855   | 1.1                  | 1.1               | 0.1   | 180   | 1.1        | 1.1      |
|                   | $10^6$          | 0.0001  | $9.5 \times 10^{-5}$ | $4.2 \times 10^4$ | 0.1   | 110   | 2.0        | 0.1-110  |
|                   |                 | 0.382   | 1.5                  | 1.5               | 0.1   | 78    | 1.5        | 1.5      |
|                   | $3 \times 10^5$ | 0.0001  | $3.2 \times 10^{-4}$ | $1.3 \times 10^4$ | 0.1   | 33    | 2.0        | 0.1-33   |
|                   |                 | 0.139   | 1.8                  | 1.8               | 0.1   | 28    | 1.8        | 1.8      |
|                   | $10^5$          | 0.0001  | $9.5 \times 10^{-4}$ | 4200              | 0.1   | 11    | 2.0        | 0.1-11   |
|                   |                 | 0.0503  | 1.9                  | 1.9               | 0.1   | 10    | 1.9        | 1.9      |
|                   | $3 \times 10^4$ | 0.0001  | 0.0032               | 1300              | 0.1   | 3.3   | 2.0        | 0.1-3.3  |
|                   |                 | 0.0156  | 2.0                  | 2.0               | 0.1   | 3.2   | 2.0        | 2.0      |
| 0.005             | $10^7$          | 0.0001  | $4.7 \times 10^{-6}$ | $8.5 \times 10^5$ | 0.1   | 1100  | 2.0        | 0.1-1100 |
|                   |                 | 2.79    | 0.53                 | 0.53              | 0.1   | 290   | 0.53       | 0.53     |
|                   | $3 \times 10^6$ | 0.0001  | $1.6 \times 10^{-5}$ | $2.5 \times 10^5$ | 0.1   | 330   | 2.0        | 0.1-330  |
|                   |                 | 1.35    | 0.86                 | 0.86              | 0.1   | 140   | 0.86       | 0.86     |
|                   | $10^6$          | 0.0001  | $4.7 \times 10^{-5}$ | $8.5 \times 10^4$ | 0.1   | 110   | 2.0        | 0.1-110  |
|                   |                 | 0.643   | 1.2                  | 1.2               | 0.1   | 66    | 1.2        | 1.2      |
|                   | $3 \times 10^5$ | 0.0001  | $1.6 \times 10^{-4}$ | $2.5 \times 10^4$ | 0.1   | 33    | 2.0        | 0.1-33   |
|                   |                 | 0.253   | 1.6                  | 1.6               | 0.1   | 26    | 1.6        | 1.6      |
|                   | $10^5$          | 0.0001  | $4.7 \times 10^{-4}$ | 8500              | 0.1   | 11    | 2.0        | 0.1-11   |
|                   |                 | 0.0964  | 1.8                  | 1.8               | 0.1   | 9.9   | 1.8        | 1.8      |
|                   | $3 \times 10^4$ | 0.0001  | 0.0016               | 2500              | 0.1   | 3.3   | 2.0        | 0.1-3.3  |
|                   |                 | 0.0308  | 1.9                  | 1.9               | 0.1   | 3.2   | 1.9        | 1.9      |
| 0.001             | $10^7$          | 0.0001  | $9.5 \times 10^{-7}$ | $4.2 \times 10^6$ | 0.1   | 1100  | 2.0        | 0.1-1100 |
|                   |                 | 6.79    | 0.26                 | 0.26              | 0.1   | 140   | 0.26       | 0.26     |
|                   | $3 \times 10^6$ | 0.0001  | $3.2 \times 10^{-6}$ | $1.3 \times 10^6$ | 0.1   | 330   | 2.0        | 0.1-330  |
|                   |                 | 3.51    | 0.44                 | 0.44              | 0.1   | 73    | 0.44       | 0.44     |
|                   | $10^6$          | 0.0001  | $9.5 \times 10^{-6}$ | $4.2 \times 10^5$ | 0.1   | 110   | 2.0        | 0.1-110  |
|                   |                 | 1.85    | 0.70                 | 0.70              | 0.1   | 38    | 0.70       | 0.70     |
|                   | $3 \times 10^5$ | 0.0001  | $3.2 \times 10^{-5}$ | $1.3 \times 10^5$ | 0.1   | 33    | 2.0        | 0.1-33   |
|                   |                 | 0.854   | 1.1                  | 1.1               | 0.1   | 18    | 1.1        | 1.1      |
|                   | $10^5$          | 0.0001  | $9.5 \times 10^{-5}$ | $4.2 \times 10^4$ | 0.1   | 11    | 2.0        | 0.1-11   |
|                   |                 | 0.382   | 1.5                  | 1.5               | 0.1   | 7.8   | 1.5        | 1.5      |
|                   | $3 \times 10^4$ | 0.0001  | $3.2 \times 10^{-4}$ | $1.3 \times 10^4$ | 0.1   | 3.3   | 2.0        | 0.1-3.3  |
|                   |                 | 0.139   | 1.8                  | 1.8               | 0.1   | 2.8   | 1.8        | 1.8      |

**Table S4: Rebinding probabilities P for different surface site densities**

| [G <sub>s</sub> (0)] <sub>min</sub> | K                   | X       | P                       |                        |                        |                |                        |                               |
|-------------------------------------|---------------------|---------|-------------------------|------------------------|------------------------|----------------|------------------------|-------------------------------|
|                                     |                     |         | S <sub>1</sub>          | S <sub>2</sub>         | S <sub>3</sub>         | S <sub>4</sub> | S <sub>max</sub>       | S range                       |
| 0.05                                | 10 <sup>7</sup>     | 0.0001  | 2.4 x 10 <sup>-9</sup>  | 0.79                   | 5.0 x 10 <sup>-6</sup> | 0.050          | 1.0 x 10 <sup>-4</sup> | 5.0 x 10 <sup>-6</sup> -0.050 |
|                                     |                     | 0.643   | 1.0 x 10 <sup>-4</sup>  | 1.0 x 10 <sup>-4</sup> | 8.2 x 10 <sup>-6</sup> | 0.050          | 1.0 x 10 <sup>-4</sup> | 1.0 x 10 <sup>-4</sup>        |
|                                     | 3 x 10 <sup>6</sup> | 0.0001  | 2.6 x 10 <sup>-8</sup>  | 0.79                   | 1.7 x 10 <sup>-5</sup> | 0.050          | 3.3 x 10 <sup>-4</sup> | 1.7 x 10 <sup>-5</sup> -0.050 |
|                                     |                     | 0.253   | 3.3 x 10 <sup>-4</sup>  | 3.3 x 10 <sup>-4</sup> | 2.1 x 10 <sup>-5</sup> | 0.050          | 3.3 x 10 <sup>-4</sup> | 3.3 x 10 <sup>-4</sup>        |
|                                     | 10 <sup>6</sup>     | 0.0001  | 2.4 x 10 <sup>-7</sup>  | 0.79                   | 5.0 x 10 <sup>-5</sup> | 0.050          | 0.0010                 | 5.0 x 10 <sup>-5</sup> -0.050 |
|                                     |                     | 0.0964  | 0.0010                  | 0.0010                 | 5.5 x 10 <sup>-5</sup> | 0.050          | 0.0010                 | 0.0010                        |
|                                     | 3 x 10 <sup>5</sup> | 0.0001  | 2.6 x 10 <sup>-6</sup>  | 0.79                   | 1.7 x 10 <sup>-4</sup> | 0.050          | 0.0033                 | 1.7 x 10 <sup>-4</sup> -0.050 |
|                                     |                     | 0.0308  | 0.0033                  | 0.0033                 | 1.7 x 10 <sup>-4</sup> | 0.050          | 0.0033                 | 0.0033                        |
|                                     | 10 <sup>5</sup>     | 0.0001  | 2.4 x 10 <sup>-5</sup>  | 0.79                   | 5.0 x 10 <sup>-4</sup> | 0.050          | 0.0098                 | 5.0 x 10 <sup>-4</sup> -0.050 |
|                                     |                     | 0.0105  | 0.0098                  | 0.0098                 | 5.1 x 10 <sup>-4</sup> | 0.050          | 0.0098                 | 0.0098                        |
|                                     | 3 x 10 <sup>4</sup> | 0.0001  | 2.7 x 10 <sup>-4</sup>  | 0.79                   | 0.0017                 | 0.050          | 0.031                  | 0.0017-0.050                  |
|                                     |                     | 0.00316 | 0.031                   | 0.031                  | 0.0017                 | 0.050          | 0.031                  | 0.031                         |
| 0.01                                | 10 <sup>7</sup>     | 0.0001  | 4.8 x 10 <sup>-10</sup> | 0.95                   | 5.0 x 10 <sup>-6</sup> | 0.050          | 1.0 x 10 <sup>-4</sup> | 5.0 x 10 <sup>-6</sup> -0.050 |
|                                     |                     | 1.85    | 1.0 x 10 <sup>-4</sup>  | 1.0 x 10 <sup>-4</sup> | 1.4 x 10 <sup>-5</sup> | 0.050          | 1.0 x 10 <sup>-4</sup> | 1.0 x 10 <sup>-4</sup>        |
|                                     | 3 x 10 <sup>6</sup> | 0.0001  | 5.3 x 10 <sup>-9</sup>  | 0.95                   | 1.7 x 10 <sup>-5</sup> | 0.050          | 3.3 x 10 <sup>-4</sup> | 1.7 x 10 <sup>-5</sup> -0.050 |
|                                     |                     | 0.855   | 3.3 x 10 <sup>-4</sup>  | 3.3 x 10 <sup>-4</sup> | 3.1 x 10 <sup>-5</sup> | 0.050          | 3.3 x 10 <sup>-4</sup> | 3.3 x 10 <sup>-4</sup>        |
|                                     | 10 <sup>6</sup>     | 0.0001  | 4.8 x 10 <sup>-8</sup>  | 0.95                   | 5.0 x 10 <sup>-5</sup> | 0.050          | 0.0010                 | 5.0 x 10 <sup>-5</sup> -0.050 |
|                                     |                     | 0.382   | 0.0010                  | 0.0010                 | 6.9 x 10 <sup>-5</sup> | 0.050          | 0.0010                 | 0.0010                        |
|                                     | 3 x 10 <sup>5</sup> | 0.0001  | 5.3 x 10 <sup>-7</sup>  | 0.95                   | 1.7 x 10 <sup>-4</sup> | 0.050          | 0.0033                 | 1.7 x 10 <sup>-4</sup> -0.050 |
|                                     |                     | 0.139   | 0.0033                  | 0.0033                 | 1.9 x 10 <sup>-4</sup> | 0.050          | 0.0033                 | 0.0033                        |
|                                     | 10 <sup>5</sup>     | 0.0001  | 4.8 x 10 <sup>-6</sup>  | 0.95                   | 5.0 x 10 <sup>-4</sup> | 0.050          | 0.0098                 | 5.0 x 10 <sup>-4</sup> -0.050 |
|                                     |                     | 0.0503  | 0.0098                  | 0.0098                 | 5.3 x 10 <sup>-4</sup> | 0.050          | 0.0098                 | 0.0098                        |
|                                     | 3 x 10 <sup>4</sup> | 0.0001  | 5.3 x 10 <sup>-5</sup>  | 0.95                   | 0.0017                 | 0.050          | 0.031                  | 0.0017-0.050                  |
|                                     |                     | 0.0156  | 0.031                   | 0.031                  | 0.0017                 | 0.050          | 0.031                  | 0.031                         |
| 0.005                               | 10 <sup>7</sup>     | 0.0001  | 2.4 x 10 <sup>-10</sup> | 0.98                   | 5.0 x 10 <sup>-6</sup> | 0.050          | 1.0 x 10 <sup>-4</sup> | 5.0 x 10 <sup>-6</sup> -0.050 |
|                                     |                     | 2.79    | 1.0 x 10 <sup>-4</sup>  | 1.0 x 10 <sup>-4</sup> | 1.9 x 10 <sup>-5</sup> | 0.050          | 1.0 x 10 <sup>-4</sup> | 1.0 x 10 <sup>-4</sup>        |
|                                     | 3 x 10 <sup>6</sup> | 0.0001  | 2.6 x 10 <sup>-9</sup>  | 0.98                   | 1.7 x 10 <sup>-5</sup> | 0.050          | 3.3 x 10 <sup>-4</sup> | 1.7 x 10 <sup>-5</sup> -0.050 |
|                                     |                     | 1.35    | 3.3 x 10 <sup>-4</sup>  | 3.3 x 10 <sup>-4</sup> | 3.9 x 10 <sup>-5</sup> | 0.050          | 3.3 x 10 <sup>-4</sup> | 3.3 x 10 <sup>-4</sup>        |
|                                     | 10 <sup>6</sup>     | 0.0001  | 2.4 x 10 <sup>-8</sup>  | 0.98                   | 5.0 x 10 <sup>-5</sup> | 0.050          | 0.0010                 | 5.0 x 10 <sup>-5</sup> -0.050 |
|                                     |                     | 0.643   | 0.0010                  | 0.0010                 | 8.2 x 10 <sup>-5</sup> | 0.050          | 0.0010                 | 0.0010                        |
|                                     | 3 x 10 <sup>5</sup> | 0.0001  | 2.6 x 10 <sup>-7</sup>  | 0.98                   | 1.7 x 10 <sup>-4</sup> | 0.050          | 0.0033                 | 1.7 x 10 <sup>-4</sup> -0.050 |
|                                     |                     | 0.253   | 0.0033                  | 0.0033                 | 2.1 x 10 <sup>-4</sup> | 0.050          | 0.0033                 | 0.0033                        |
|                                     | 10 <sup>5</sup>     | 0.0001  | 2.4 x 10 <sup>-6</sup>  | 0.98                   | 5.0 x 10 <sup>-4</sup> | 0.050          | 0.0098                 | 5.0 x 10 <sup>-4</sup> -0.050 |
|                                     |                     | 0.0964  | 0.0098                  | 0.0098                 | 5.5 x 10 <sup>-4</sup> | 0.050          | 0.0098                 | 0.0098                        |
|                                     | 3 x 10 <sup>4</sup> | 0.0001  | 2.6 x 10 <sup>-5</sup>  | 0.98                   | 0.0017                 | 0.050          | 0.031                  | 0.0017-0.050                  |
|                                     |                     | 0.0308  | 0.031                   | 0.031                  | 0.0017                 | 0.050          | 0.031                  | 0.031                         |
| 0.001                               | 10 <sup>7</sup>     | 0.0001  | 4.8 x 10 <sup>-11</sup> | 1.0                    | 5.0 x 10 <sup>-6</sup> | 0.050          | 1.0 x 10 <sup>-4</sup> | 5.0 x 10 <sup>-6</sup> -0.050 |
|                                     |                     | 6.79    | 1.0 x 10 <sup>-4</sup>  | 1.0 x 10 <sup>-4</sup> | 3.9 x 10 <sup>-5</sup> | 0.050          | 1.0 x 10 <sup>-4</sup> | 1.0 x 10 <sup>-4</sup>        |
|                                     | 3 x 10 <sup>6</sup> | 0.0001  | 5.3 x 10 <sup>-10</sup> | 1.0                    | 1.7 x 10 <sup>-5</sup> | 0.050          | 3.3 x 10 <sup>-4</sup> | 1.7 x 10 <sup>-5</sup> -0.050 |
|                                     |                     | 3.51    | 3.3 x 10 <sup>-4</sup>  | 3.3 x 10 <sup>-4</sup> | 7.5 x 10 <sup>-5</sup> | 0.050          | 3.3 x 10 <sup>-4</sup> | 3.3 x 10 <sup>-4</sup>        |
|                                     | 10 <sup>6</sup>     | 0.0001  | 4.8 x 10 <sup>-9</sup>  | 1.0                    | 5.0 x 10 <sup>-5</sup> | 0.050          | 0.0010                 | 5.0 x 10 <sup>-5</sup> -0.050 |
|                                     |                     | 1.85    | 0.0010                  | 0.0010                 | 1.4 x 10 <sup>-4</sup> | 0.050          | 0.0010                 | 0.0010                        |
|                                     | 3 x 10 <sup>5</sup> | 0.0001  | 5.3 x 10 <sup>-8</sup>  | 1.0                    | 1.7 x 10 <sup>-4</sup> | 0.050          | 0.0033                 | 1.7 x 10 <sup>-4</sup> -0.050 |
|                                     |                     | 0.854   | 0.0033                  | 0.0033                 | 3.1 x 10 <sup>-4</sup> | 0.050          | 0.0033                 | 0.0033                        |
|                                     | 10 <sup>5</sup>     | 0.0001  | 4.8 x 10 <sup>-7</sup>  | 1.0                    | 5.0 x 10 <sup>-4</sup> | 0.050          | 0.0098                 | 5.0 x 10 <sup>-4</sup> -0.050 |
|                                     |                     | 0.382   | 0.0098                  | 0.0098                 | 6.9 x 10 <sup>-4</sup> | 0.050          | 0.0098                 | 0.0098                        |
|                                     | 3 x 10 <sup>4</sup> | 0.0001  | 5.3 x 10 <sup>-6</sup>  | 1.0                    | 0.0017                 | 0.050          | 0.031                  | 0.0017-0.050                  |
|                                     |                     | 0.139   | 0.031                   | 0.031                  | 0.0019                 | 0.050          | 0.031                  | 0.031                         |
